# Supplementary material for: Adsorption and diffusion of Li with S on pristine and defected graphene
Source: Royal Society of Chemistry journal article supplement (doi:10.1039/c6cp04984b), 2016-01-01
Supplement: c6cp04984b1.pdf [file c6cp04984b1.pdf]

## Supporting Information

### Adsorption and Diffusion of Li with S on Pristine and Double-Vacancy Defected Graphene for Cathodes of Li-S Batteries

Zhicong Liang<sup>a</sup>, Xiaofeng Fan<sup>a,\*</sup>, David J. Singh<sup>c</sup> and W.T. Zheng<sup>a,b†</sup>

- College of Materials Science and Engineering, Key Laboratory of Automobile Materials of MOE, Jilin University, Changchun 130012, China
- State Key Laboratory of Automotive Simulation and Control, Jilin University, Changchun 130012, China
- Department of Physics and Astronomy, University of Missouri, Columbia, Missouri 65211-7010, USA

<sup>\*</sup>,<sup>†</sup> Correspondence and requests for materials should be addressed, [xffan@jlu.edu.cn](mailto:xffan@jlu.edu.cn) (X. F. Fan); [wzheng@jlu.edu.cn](mailto:wzheng@jlu.edu.cn) (W.T. Zheng)

**Figure S1**

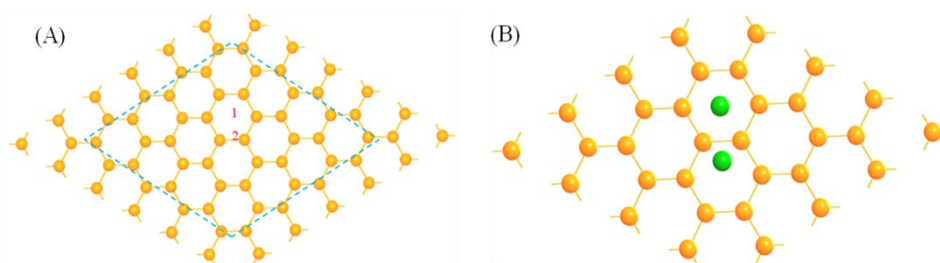

Figure S1. Schematic representation of the possible configurations (A) and the most stable configuration of  $S_2$  adsorbed on graphene. Note the numbers in (A) represent the mass center of  $S_2$  for the two possible configurations.

**Table S1.** Adsorption energies ( $E_{ad}$ ) for  $S_2$  adsorbed on pristine graphene for the two configurations in Figure S1 (A).

| Site | $E_{ad}$ (eV) |
|------|---------------|
| 1    | -0.080        |
| 2    | -0.094        |

**Figure S2**

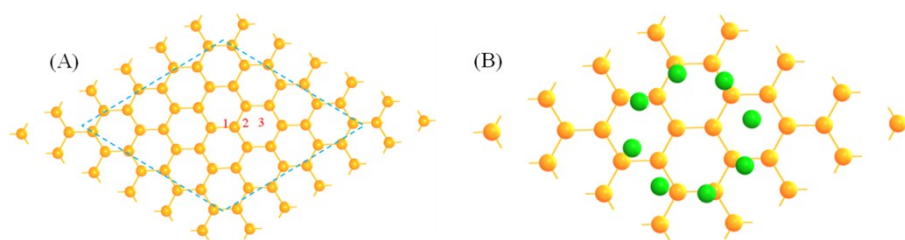

Figure S2. Schematic representation of the possible configurations (A) and the most stable configuration (B) of  $S_8$  adsorbed on graphene. Note the numbers in (A) represent the mass center of  $S_8$  for the possible configurations.

**Table S2** Adsorption energies ( $E_{ad}$ ) for  $S_8$  adsorbed on pristine graphene with double-vacancy for the possible configurations in Figure S2 (A).

| Site | $E_{ad}$ (eV) |
|------|---------------|
| 1    | -0.088        |
| 2    | -0.085        |
| 3    | -0.088        |

**Figure S3**

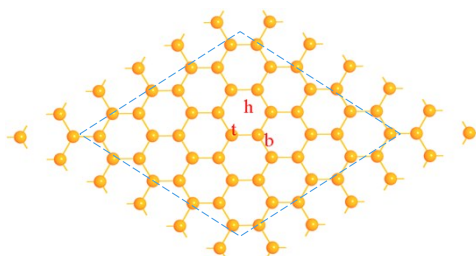

Figure S3. Schematic representation of the possible sites of S adsorbed on graphene

**Table S3.** Average distance between S and carbon ( $d_{S-C}$ ), angle between S and the near-neighbor C ( $\theta_{C-S-C}$ ), adsorption energy ( $E_{ad}$ ) for S adsorbed on pristine graphene with the sites shown in Figure S3

| Site | $d_{S-C}$ | $\theta_{C-S-C}$ | $E_{ad}$ (eV) |
|------|-----------|------------------|---------------|
| t    | 1.93      | --               | -0.659        |
| h    | 3.31      | 51.1             | -0.369        |
| b    | 1.91      | 46.0             | -0.995        |

**Figure S4**

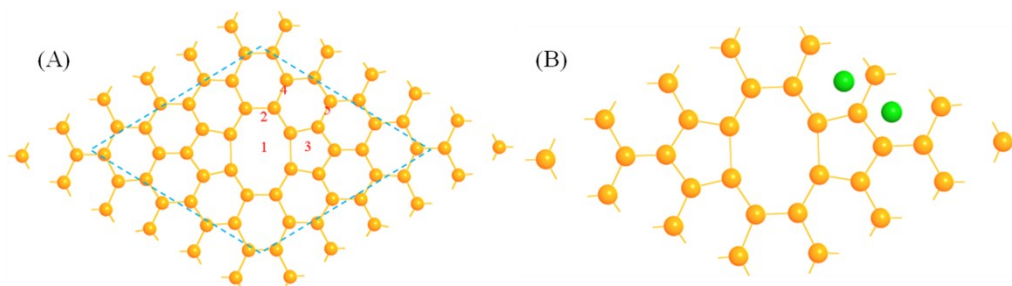

Figure S4. Schematic representation of the possible configurations (A) and the most stable configuration (B) of  $S_2$  adsorbed on graphene with double-vacancy. Note the numbers in (A) represent the mass center of  $S_2$  for the possible configurations.

**Table S4.** Adsorption energies ( $E_{ad}$ ) for  $S_2$  adsorbed on graphene with double-vacancy for the possible configurations in Figure S4 (A).

| Site | $E_{ad}$ (eV) |
|------|---------------|
| 1    | -0.001        |
| 2    | -0.059        |
| 3    | -0.050        |
| 4    | -0.088        |
| 5    | -0.091        |

**Figure S5**

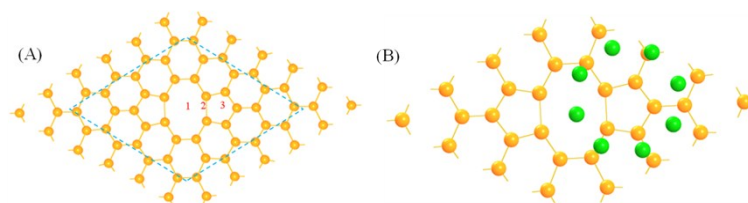

Figure S5. (A) Schematic representation of the possible configurations (A) and the most stable configuration (B) of  $S_8$  adsorbed on graphene with double-vacancy. Note the numbers in (A) represent the mass center of  $S_8$  for the possible configurations.

**Table S5.** Adsorption energies ( $E_{ad}$ ) for  $S_8$  adsorbed on pristine graphene with double-vacancy for the possible configurations in Figure S5 (A).

| Site | $E_{ad}$ (eV) |
|------|---------------|
| 1    | -0.083        |
| 2    | -0.086        |
| 3    | -0.092        |

**Figure S6**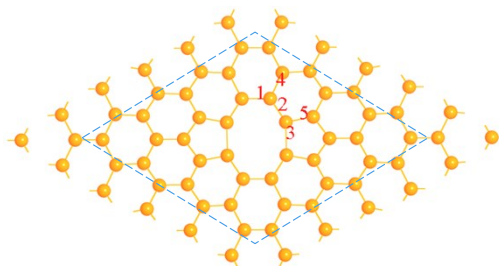

Figure S6. Schematic representation of the possible sites of S adsorbed graphene with double-vacancy

**Table S6.** Average distance between S and carbon ( $d_{S-C}$ ), angle between S and the near-neighbor C ( $\theta_{C-S-C}$ ), adsorption energy ( $E_{ad}$ ) for S adsorbed on double vacancy graphene with the sites shown in Figure S6

| Site | $d_{S-C}$ | $\theta_{C-S-C}$ | $E_{ad}(eV)$ |
|------|-----------|------------------|--------------|
| 1    | 1.90      | 45.9             | -1.018       |
| 2    | 1.85      | 51.5             | -2.166       |
| 3    | 1.73      | 95.3             | -4.224       |
| 4    | 1.86      | 53.3             | -1.623       |
| 5    | 1.88      | 46.3             | -1.851       |

**Figure S7**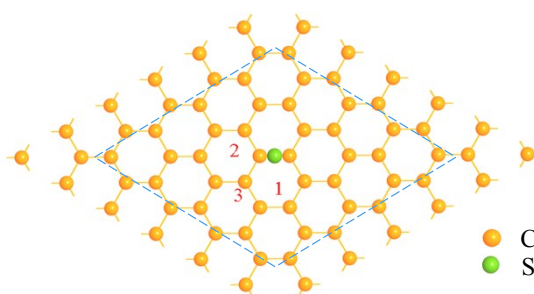

Figure S7. Schematic representation of possible configurations of LiS adsorbed on graphene. Note the numbers represent the possible sites of Li ion.

**TableS7.** Average distance between S and Li ( $d_{S-Li}$ ), distance between S and the nearest-neighbor C ( $d_{S-C}$ ), angle between S and the near-neighbor C ( $\theta_{C-S-C}$ ), adsorption energy ( $E_{ad}$ ) and cohesive Energy ( $\Delta E_c$ ) for the adsorption of LiS cluster on pristine graphene.

| Site | $d_{S-Li}$ | $d_{S-C}$ | $\theta_{C-S-C}$ | $E_{ad}(eV)$ | $\Delta E_c(eV)$ |
|------|------------|-----------|------------------|--------------|------------------|
| 1    | 2.15       | 3.28      | 25.1             | -0.323       | -2.646           |
| 2    | 2.20       | 3.37      | 24.3             | -0.879       | -3.203           |
| 3    | 2.23       | 3.40      | 23.5             | -0.813       | -3.136           |

**Figure S8**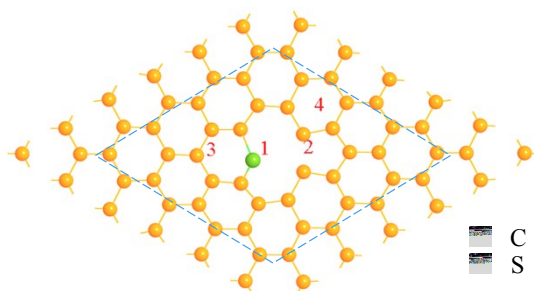

Figure S8. Schematic representation of possible configurations of LiS adsorbed on graphene with double-vacancy. Note the numbers represent the possible sites of Li ion.

Table S8. Average distance between S and Li ( $d_{S-Li}$ ), distance between S and the nearest-neighbor C ( $d_{S-C}$ ), angle between S and the near-neighbor C ( $\theta_{C-S-C}$ ), adsorption energy ( $E_{ad}$ ) and cohesive Energy ( $\Delta E_c$ ) for the adsorption of LiS cluster on double-vacancy graphene

| Site | $d_{S-Li}$ | $d_{S-C}$ | $\theta_{C-S-C}$ | $E_{ad}(eV)$ | $\Delta E_c(eV)$ |
|------|------------|-----------|------------------|--------------|------------------|
| 1    | 2.27       | 1.73      | 97.3             | -1.591       | -0.687           |
| 2    | 2.57       | 1.75      | 94.0             | -3.212       | -2.307           |
| 3    | 2.36       | 1.76      | 93.7             | -2.809       | -1.904           |
| 4    | 3.65       | 1.75      | 94.4             | -2.927       | -2.022           |

**Figure S9**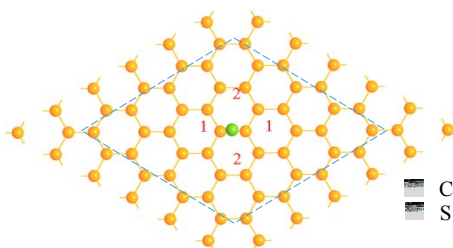

Figure S9. Schematic representation of two possible configurations of  $Li_2S$  adsorbed on graphene, Note the numbers represent the locations of two Li atoms.

**Table S9.** Average distance between S and Li ( $d_{S-Li}$ ), angle between S and Li ( $\theta_{Li-S-Li}$ ), distance between S and the nearest-neighbor C ( $d_{S-C}$ ), angle between S and the near-neighbor C ( $\theta_{C-S-C}$ ), adsorption energy ( $E_{ad}$ ) and cohesive Energy ( $\Delta E_c$ ) for the adsorption of  $Li_2S$  cluster on pristine graphene.

| Site | $d_{S-Li}$ | $\theta_{Li-S-Li}$ | $d_{S-C}$ | $\theta_{C-S-C}$ | $E_{ad}(eV)$ | $\Delta E_c(eV)$ |
|------|------------|--------------------|-----------|------------------|--------------|------------------|
| 1    | 2.20       | 105.4              | 3.51      | 23.4             | -1.086       | -3.326           |
| 2    | 2.19       | 81.2               | 3.76      | 21.9             | -1.095       | -3.331           |

**Figure S10**

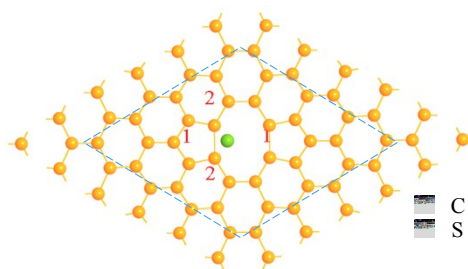

Figure S10. Schematic representation of proposed two possible configurations of  $\text{Li}_2\text{S}$  adsorbed on graphene with double-vacancy, Note the numbers represent the locations of two Li atoms.

**TableS10.** Average distance between S and Li ( $d_{\text{S-Li}}$ ), angle between S and Li ( $\theta_{\text{Li-S-Li}}$ ), distance between S and the nearest-neighbor C ( $d_{\text{S-C}}$ ), angle between S and the near-neighbor C ( $\theta_{\text{C-S-C}}$ ), adsorption energy ( $E_{\text{ad}}$ ) and cohesive Energy ( $\Delta E_{\text{c}}$ ) for the adsorption of  $\text{Li}_2\text{S}$  cluster on double-vacancy graphene.

| Site | $d_{\text{S-Li}}$ | $\theta_{\text{Li-S-Li}}$ | $d_{\text{S-C}}$ | $\theta_{\text{C-S-C}}$ | $E_{\text{ad}}(\text{eV})$ | $\Delta E_{\text{c}}(\text{eV})$ |
|------|-------------------|---------------------------|------------------|-------------------------|----------------------------|----------------------------------|
| 1    | 2.17              | 133.4                     | 2.94             | 34.5                    | -1.501                     | -1.919                           |
| 2    | 2.25              | 123.8                     | 2.72             | 36.9                    | -1.661                     | -1.999                           |

**Figure S11**

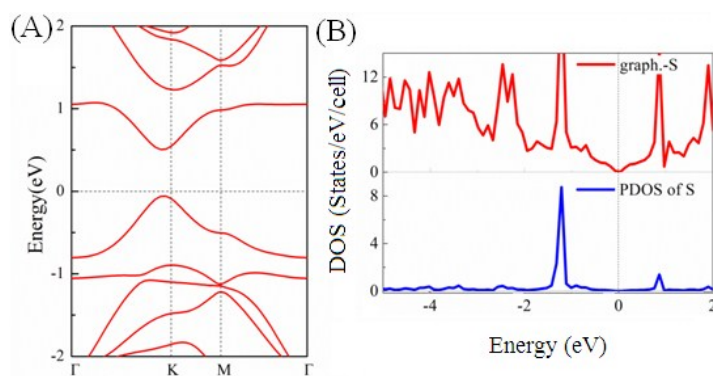

Figure S11. Band structure, density of states (DOS) and partial density of states (PDOS) of S-adsorbed graphene.

Figure S12

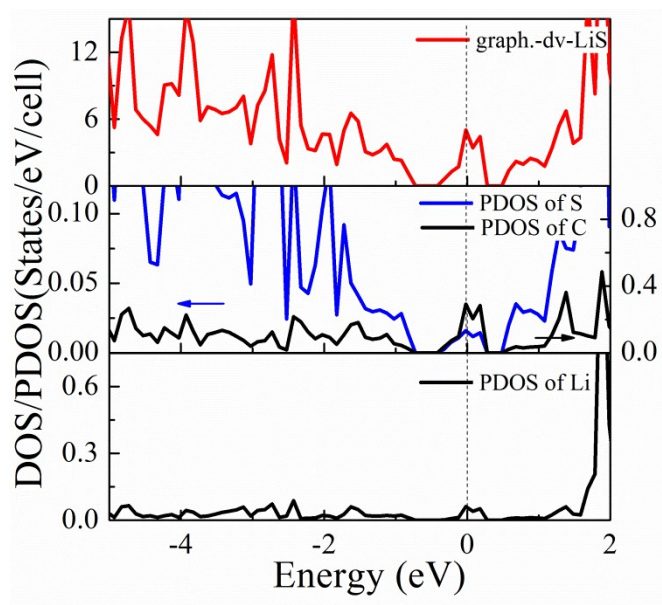

Figure S12, The density of states (DOS) and partial density of states (PDOS) of two-vacancy graphene with one S adsorbed at the edge of vacancy and one Li adsorbed near the vacancy.
